# Supplementary material for: Antiproliferative effect of rosehip tea phenolics in prostate cancer cell lines
Source: publisher site journal article supplement (doi:10.1515/tjb-2019-0262), 2020-08-01

**Figure 1.** The content of phenolic molecules (ng/mL) in rosehip teas which were obtained with boiling and steeping in different time points. A. The content of quercetin, B. The content of kaempferol, C. The content of myricetin, and D. The content of ellagic acid.

A.

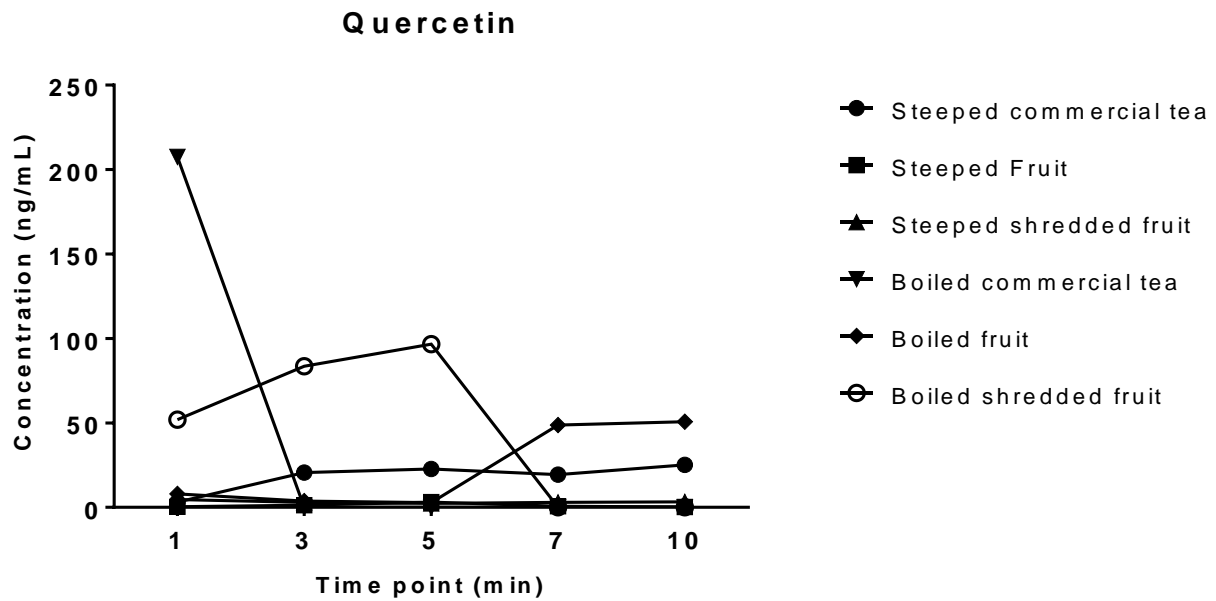

B.

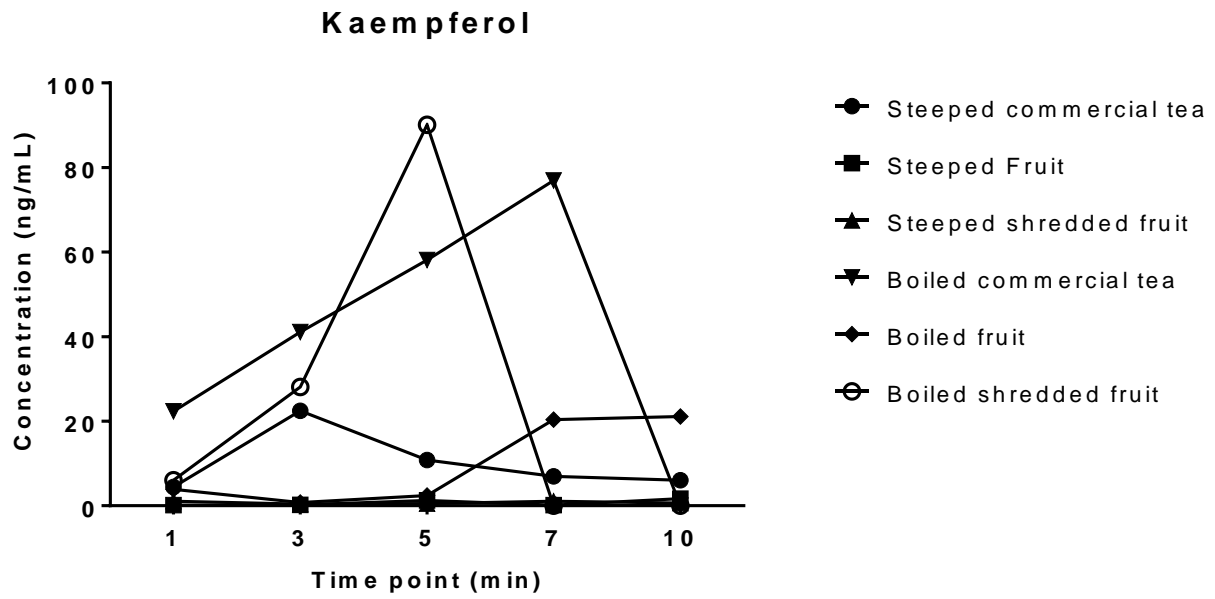

C.

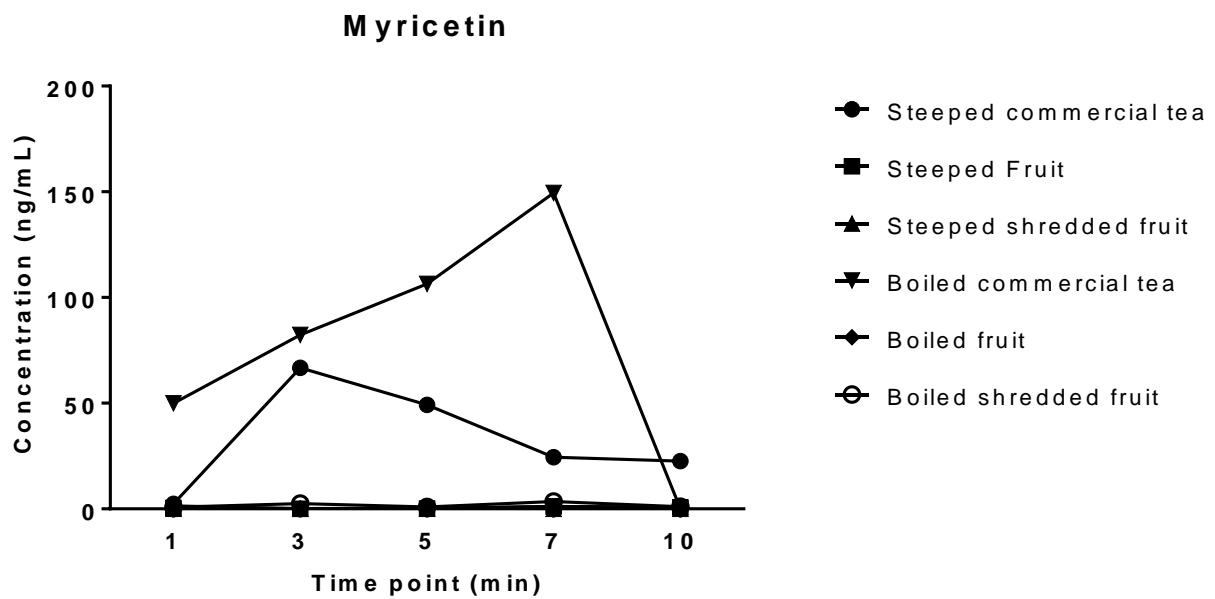

D.

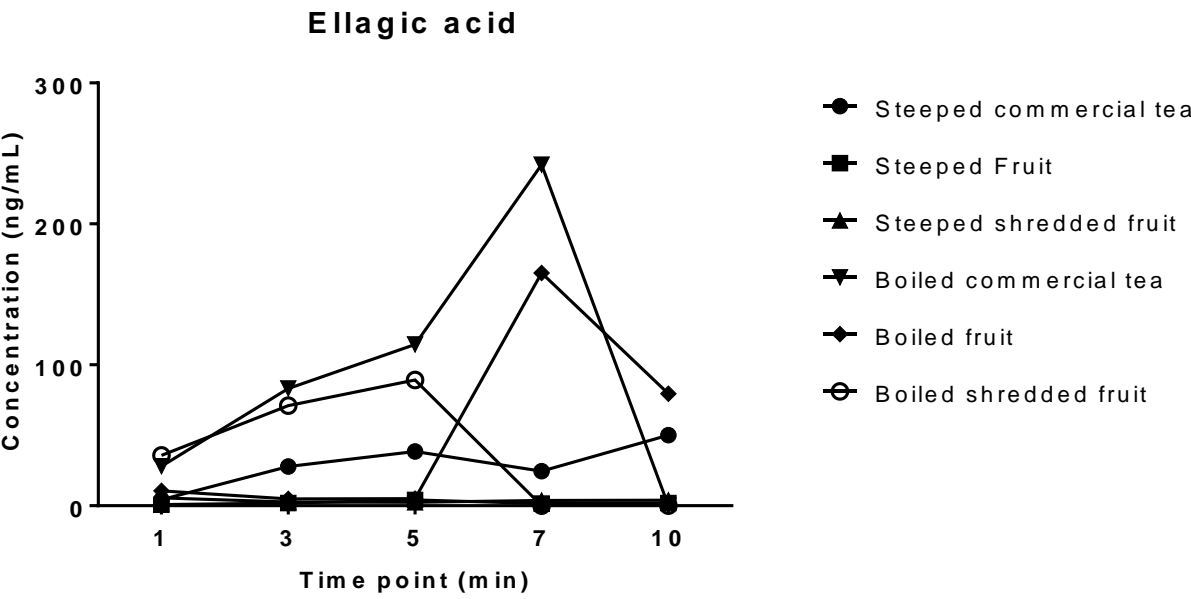

**Figure 2.** Real-time monitoring of cytotoxic effects of commercial phenolic compounds on VCaP cells. A. IC<sub>50</sub> curves of quercetin, B. IC<sub>50</sub> curves of kaempferol, C. IC<sub>50</sub> curves of myricetin, D. IC<sub>50</sub> curves of ellagic acid. (1; 24<sup>th</sup> h, 2; 48<sup>th</sup> h, and 3; 72<sup>nd</sup> h).

A.

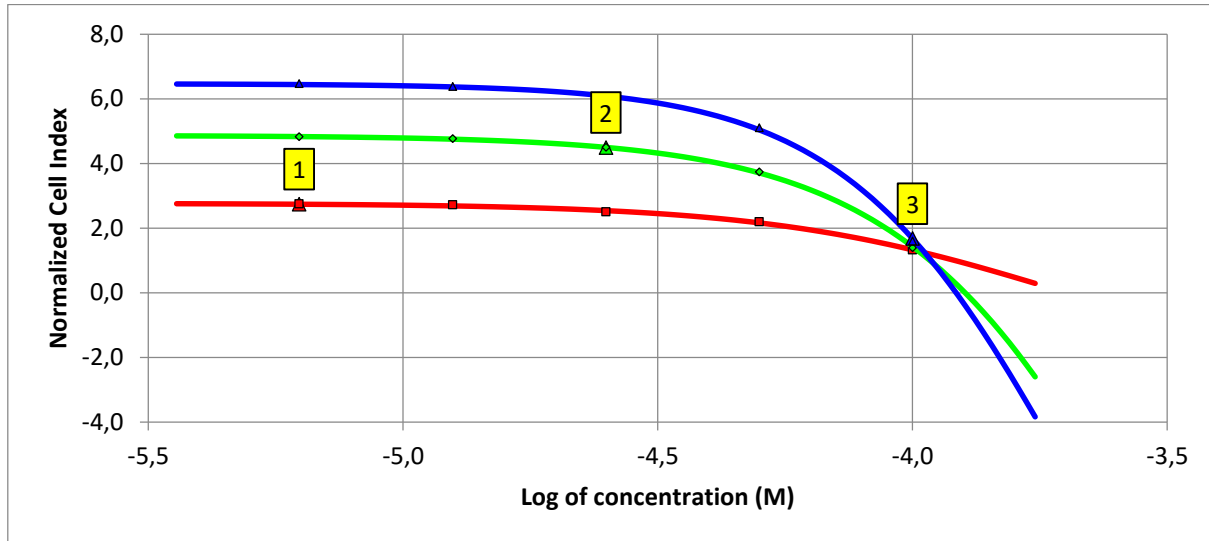

B.

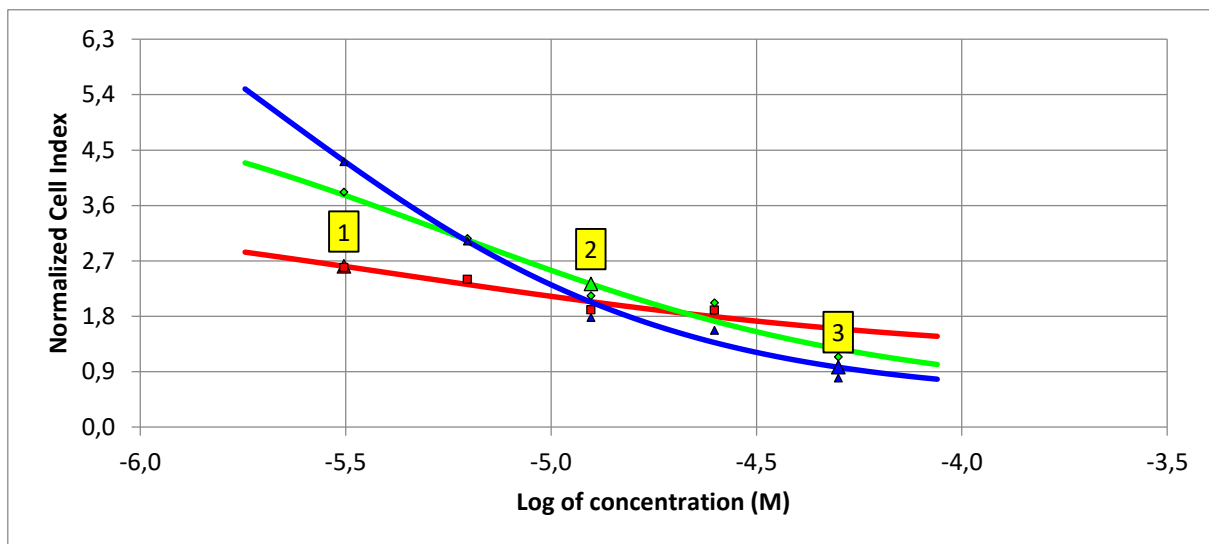

C.

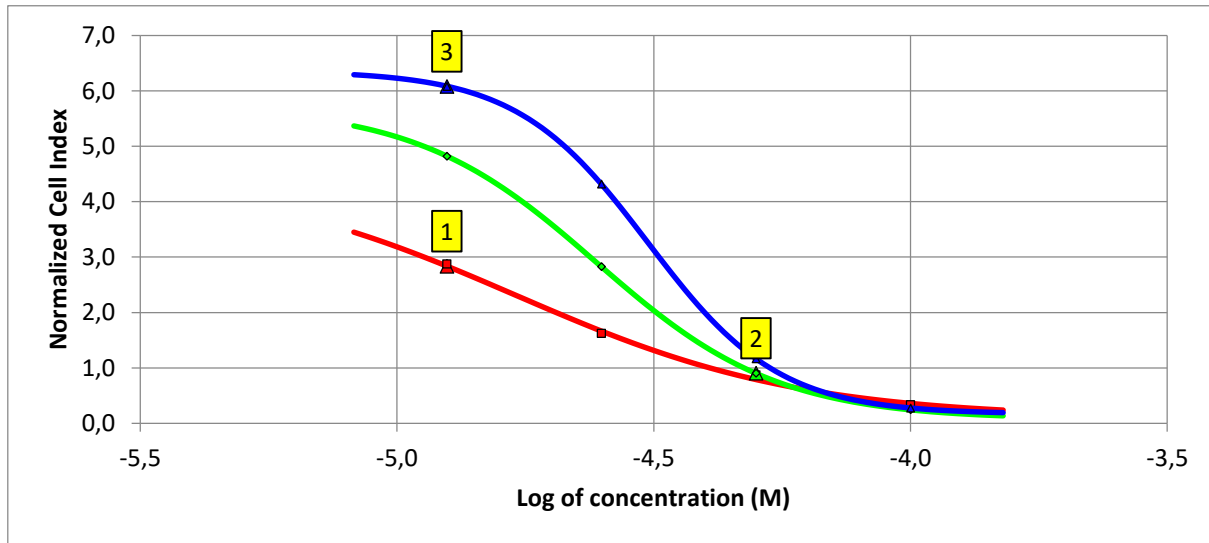

D.

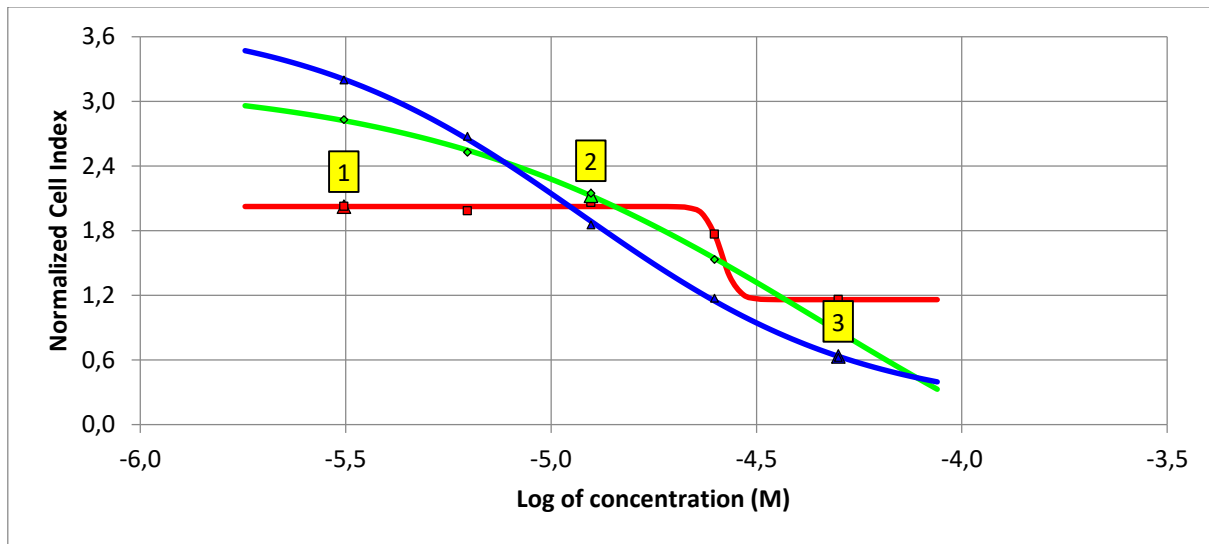

**Figure 3.** Real-time monitoring of cytotoxic effects of commercial phenolic compounds on LNCaP cells. A. IC<sub>50</sub> curves of quercetin, B. IC<sub>50</sub> curves of kaempferol, C. IC<sub>50</sub> curves of myricetin, D. IC<sub>50</sub> curves of ellagic acid. (1;24<sup>th</sup> h, 2;48<sup>th</sup> h, and 3;72<sup>nd</sup> h).

A.

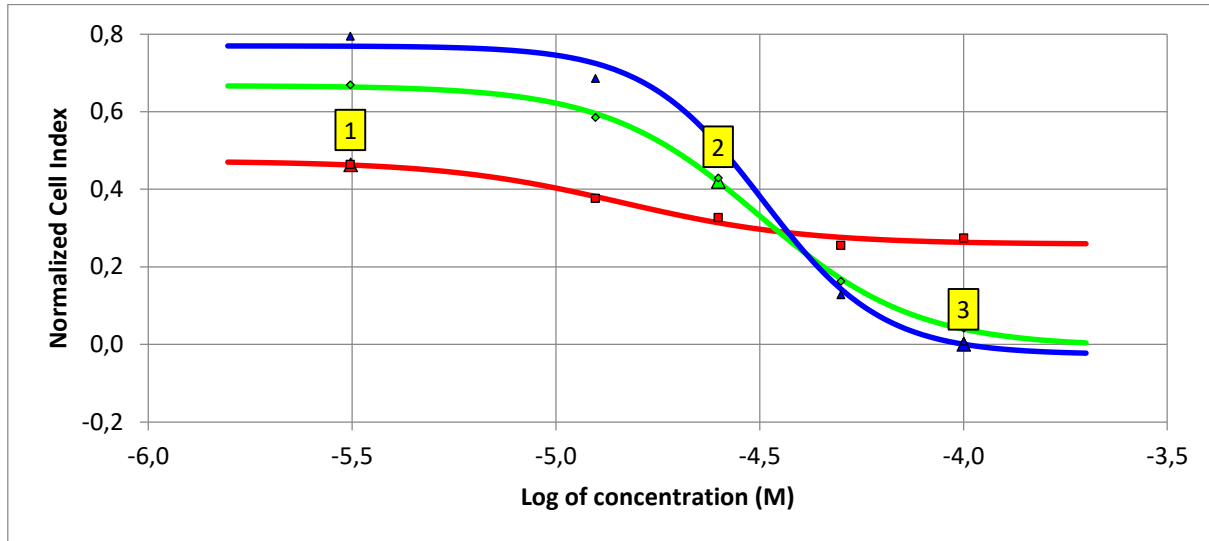

B.

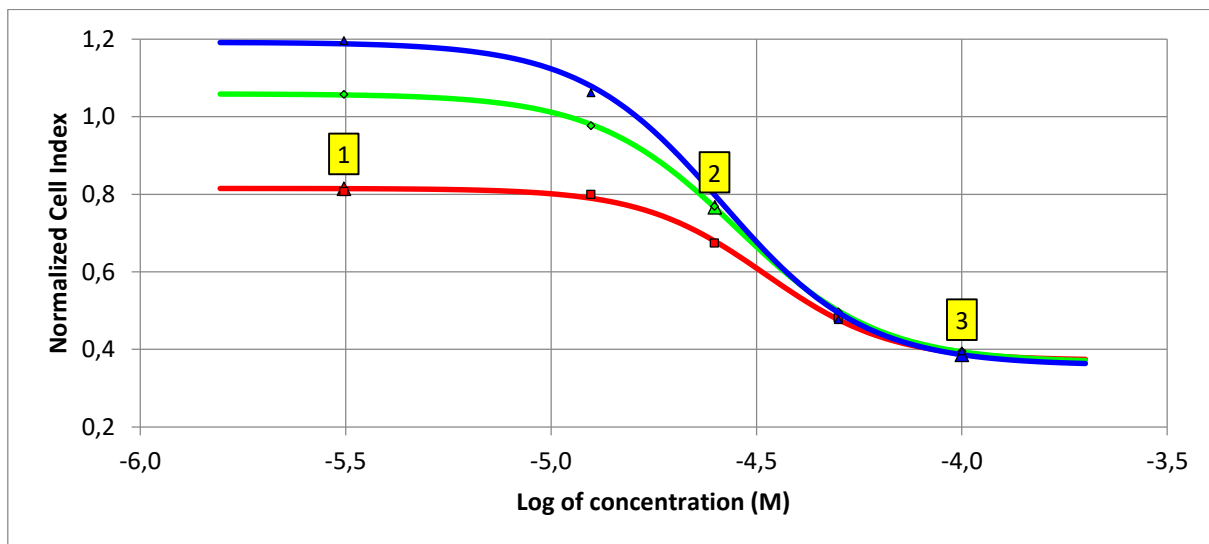

C.

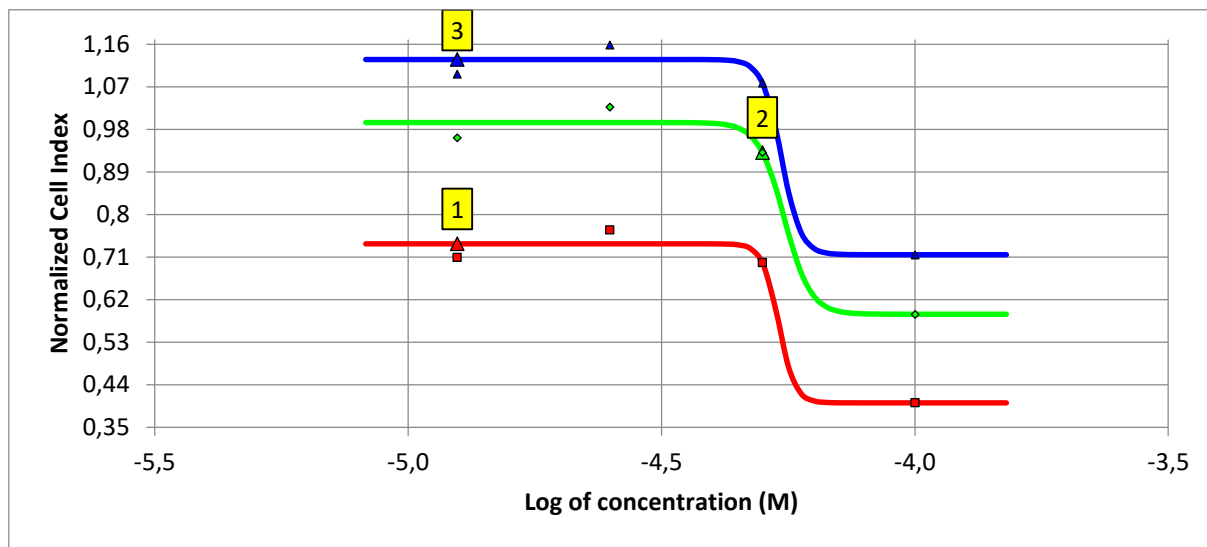

D.

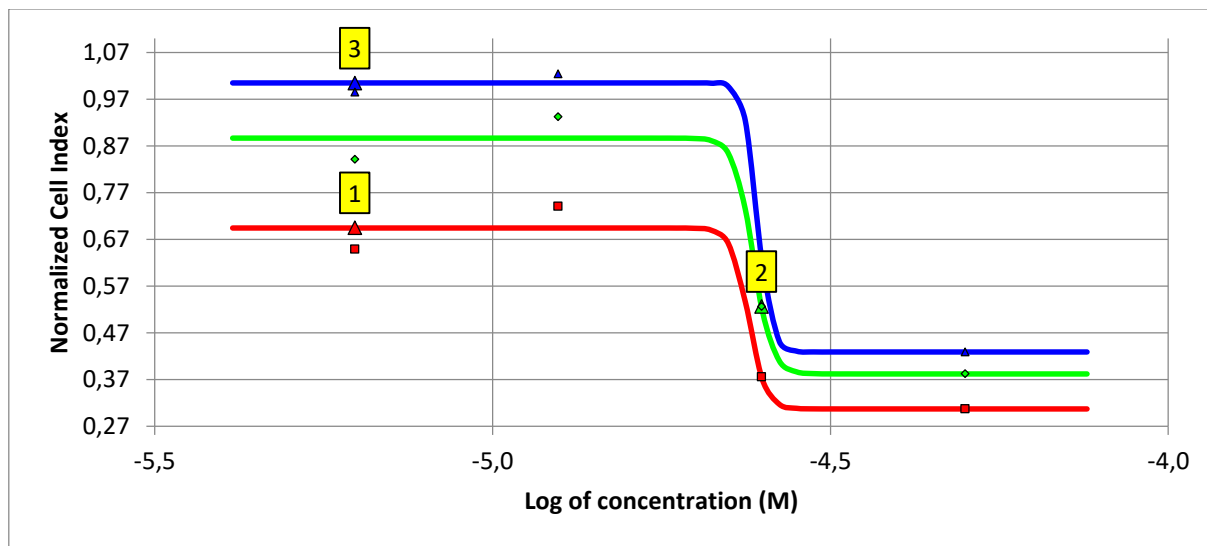

Supplement: Supplementary file 1 [file j_tjb-2019-0262_suppl_001.pdf]
