# Supplementary material for: Antiproliferative effect of rosehip tea phenolics in prostate cancer cell lines
Source: publisher site journal article supplement (doi:10.1515/tjb-2019-0262), 2020-08-01
Supplement: Supplementary file 2 [file j_tjb-2019-0262_suppl_002.pdf]

**Table 1.** MRM values of studied phenolic compound standards.

| Compound                   | Ion Mode | Mass  | Daughter | Collision | Cone Vol. |
|----------------------------|----------|-------|----------|-----------|-----------|
| Kaempferol (Fluka 96353)   | ES+      | 287   | 153      | 33        | 55        |
|                            |          |       | 165      | 33        | 40        |
|                            |          |       | 139.05   |           |           |
|                            |          |       | 165.1    |           |           |
| Quercetin (Sigma Q4951)    | ES+      | 303.1 | 153.2    | 31        | 55        |
|                            |          |       | 229.2    |           | 43        |
| Ellagic Acid (Sigma 14668) | ES+      | 303.1 | 229      | 30        | 65        |
| Myricetine (Sigma 72576)   | ES+      | 537   | 321      | 33        | 46        |
